# Supplementary material
Source: Springer Nature journal article supplement (https://www.springermedizin.de/resource/supplementary/12885_2005_367_MOESM2_ESM.pdf/9469630)

**A****EFFECTS OF TREATMENTS ON BONE**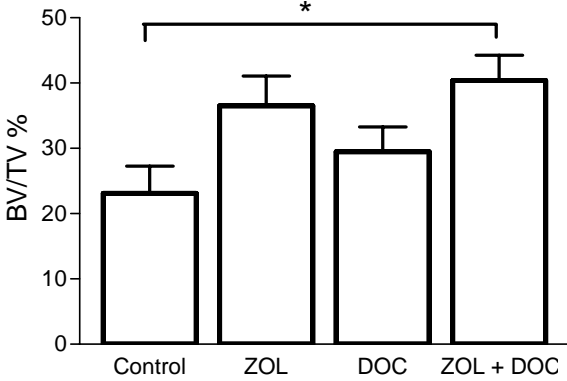**B****EFFECTS OF TREATMENTS ON SERUM PSA LEVELS**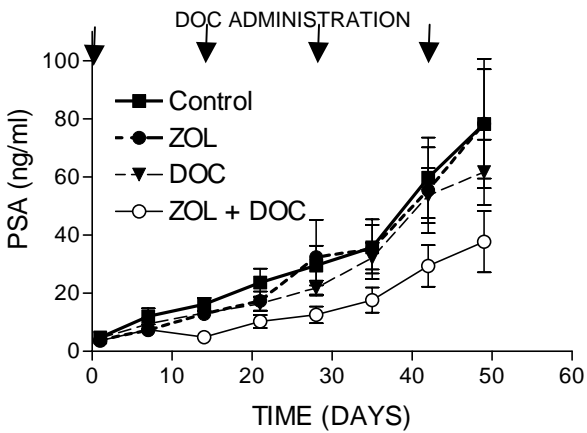**C****EFFECTS OF TREATMENTS ON TUMOR GROWTH IN BONE**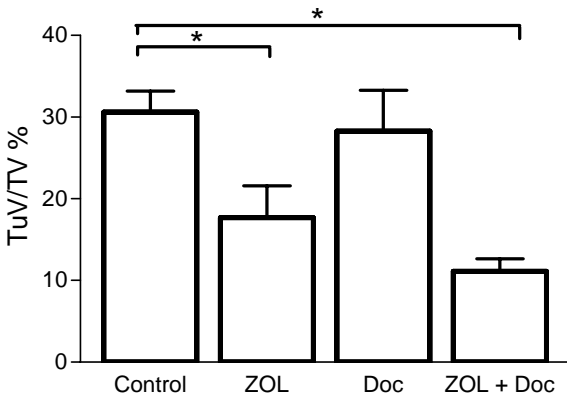

Supplement: MOESM2 [file 9469630]
